# Supplementary material for: Lanthanide doping enabled multimodal luminescence in layered lead-free double perovskite Cs4MnBi2Cl12
Source: Royal Society of Chemistry journal article supplement (doi:10.1039/d2tc01024k), 2022-01-01

## Supporting Information

### **Lanthanide Doping Enabled Multimodal Luminescence in Layered Lead-free Double Perovskite Cs<sub>4</sub>MnBi<sub>2</sub>Cl<sub>12</sub>**

*Jingyu Li<sup>1</sup>, Jiawen Xiao<sup>1, \*</sup>, Taifeng Lin<sup>2</sup>, Zheng-Guang Yan<sup>1</sup>, Xiaodong Han<sup>1</sup>*

<sup>1</sup>Institute of Microstructure and Property of Advanced Materials, Beijing Key Lab of Microstructure and Property of Advanced Materials, Faculty of Materials and Manufacturing, Beijing University of Technology, Beijing 100124, China

E-mail: [xiaojw@bjut.edu.cn](mailto:xiaojw@bjut.edu.cn)

<sup>2</sup>Faculty of Environment and Life, Beijing University of Technology, Beijing 100124, China

Keywords: Lead-free, rare earth, multimodal luminescence, double perovskite, near-infrared emission

---

**Table S1.** Crystal data and structure refinement result for Cs<sub>4</sub>MnBi<sub>2</sub>Cl<sub>12</sub>.

|                | Cs <sub>4</sub> MnBi <sub>2</sub> Cl <sub>12</sub> | 10% Yb        |
|----------------|----------------------------------------------------|---------------|
| Space group    | R $\bar{3}$ m                                      | R $\bar{3}$ m |
| Crystal system | trigonal                                           | trigonal      |
| a(Å)           | 7.5426                                             | 7.5403        |
| b(Å)           | 7.5426                                             | 7.5403        |
| c(Å)           | 36.9150                                            | 36.9205       |
| $\alpha$ (deg) | 90.0000                                            | 90.0000       |
| $\beta$ (deg)  | 90.0000                                            | 90.0000       |
| $\gamma$ (deg) | 120.0000                                           | 120.0000      |

---

**Table S2.**

**(a)** Atomic coordinates and atomic occupancies of  $\text{Cs}_4\text{MnBi}_2\text{Cl}_{12}$  at room temperature.

| Atom | X       | Y       | Z       | Occupancy |
|------|---------|---------|---------|-----------|
| Bi3  | 0.66670 | 0.33330 | 0.58069 | 0.16667   |
| Cs4  | 0.33330 | 0.66670 | 0.54168 | 0.16667   |
| Cs5  | 1.00000 | 1.00000 | 0.62477 | 0.16667   |
| Cl7  | 0.82925 | 0.65850 | 0.54189 | 0.50000   |
| Cl9  | 0.49142 | 0.50858 | 0.62691 | 0.50000   |
| Mn1  | 0.33330 | 0.66670 | 0.66670 | 0.08333   |

**(b)** Atomic coordinates and atomic occupancies of 10% Yb doped  $\text{Cs}_4\text{MnBi}_2\text{Cl}_{12}$  at room temperature.

| Atom    | X       | Y       | Z       | Occupancy |
|---------|---------|---------|---------|-----------|
| Bi3     | 0.66670 | 0.33330 | 0.57876 | 0.15416   |
| Cs4     | 0.33330 | 0.66670 | 0.53937 | 0.16667   |
| Cs5     | 1.00000 | 1.00000 | 0.62512 | 0.16667   |
| Cl7     | 0.83092 | 0.66184 | 0.53768 | 0.50000   |
| Cl9     | 0.49142 | 0.50858 | 0.62691 | 0.50000   |
| Mn1     | 0.33330 | 0.66670 | 0.66670 | 0.00812   |
| Yb (Bi) | 0.66670 | 0.33330 | 0.57876 | 0.01250   |
| Yb (Mn) | 0.33330 | 0.66670 | 0.66670 | 0.00021   |

---

**Table S3.** Comparisons of dopant concentrations obtained from ICP-AES analysis of the Yb<sup>3+</sup> doped, Er<sup>3+</sup> doped and Yb<sup>3+</sup>-Er<sup>3+</sup> co-doped Cs<sub>4</sub>MnBi<sub>2</sub>Cl<sub>12</sub> products.

|                            | 10% Yb | 20% Yb | 20% Er | 20% Yb 2% Er |
|----------------------------|--------|--------|--------|--------------|
| Mn: Bi+Ln<br>[molar ratio] | 0.44   | 0.48   | 0.4    | 0.46         |
| Bi: Bi+Ln<br>[molar ratio] | 0.90   | 0.81   | 0.71   | 0.75         |
| Er: Bi+Ln<br>[molar ratio] | 0      | 0      | 0.29   | 0.03         |
| Yb: Bi+Ln<br>[molar ratio] | 0.10   | 0.19   | 0      | 0.22         |

---

---

**Table S4.** PLQYs data of Yb<sup>3+</sup> doped Cs<sub>4</sub>MnBi<sub>2</sub>Cl<sub>12</sub> product.

|       | Cs <sub>4</sub> MnBi <sub>2</sub> Cl <sub>12</sub> | 5%Yb  | 10%Yb | 20%Yb |
|-------|----------------------------------------------------|-------|-------|-------|
| PLQYs | 1.52%                                              | 0.95% | 1.41% | 1.13% |

---

**Table S5.** The detailed material ratio of Er<sup>3+</sup> doped Cs<sub>4</sub>MnBi<sub>2</sub>Cl<sub>12</sub>.

|                                       | 5%Er | 10% Er | 20% Er |
|---------------------------------------|------|--------|--------|
| Bi <sub>2</sub> O <sub>3</sub> [mmol] | 0.95 | 0.90   | 0.80   |
| Er <sub>2</sub> O <sub>3</sub> [mmol] | 0.05 | 0.10   | 0.20   |
| MnCl <sub>2</sub> [mmol]              | 1.00 | 1.00   | 1.00   |
| CsCl [mmol]                           | 4.00 | 4.00   | 4.00   |
| HCl [mL]                              | 10   | 10     | 10     |

---

**Table S6.** The detailed material ratio of Yb<sup>3+</sup> doped Cs<sub>4</sub>MnBi<sub>2</sub>Cl<sub>12</sub>

|                                       | 5%Yb | 10%Yb | 20%Yb |
|---------------------------------------|------|-------|-------|
| Bi <sub>2</sub> O <sub>3</sub> [mmol] | 0.95 | 0.90  | 0.80  |
| Yb <sub>2</sub> O <sub>3</sub> [mmol] | 0.05 | 0.10  | 0.20  |
| MnCl <sub>2</sub> [mmol]              | 1.00 | 1.00  | 1.00  |
| CsCl [mmol]                           | 4.00 | 4.00  | 4.00  |
| HCl [mL]                              | 10   | 10    | 10    |

---

**Table S7.** The detailed material ratio of Er<sup>3+</sup> and Yb<sup>3+</sup> doped Cs<sub>4</sub>MnBi<sub>2</sub>Cl<sub>12</sub>

|                                       | 10% Yb 1% Er | 20% Yb 2% Er |
|---------------------------------------|--------------|--------------|
| Bi <sub>2</sub> O <sub>3</sub> [mmol] | 0.89         | 0.78         |
| Yb <sub>2</sub> O <sub>3</sub> [mmol] | 0.10         | 0.20         |
| Er <sub>2</sub> O <sub>3</sub> [mmol] | 0.01         | 0.02         |
| MnCl <sub>2</sub> [mmol]              | 1.00         | 1.00         |
| CsCl [mmol]                           | 4.00         | 4.00         |
| HCl [mL]                              | 10           | 10           |

---

**Figure S1.** Scanning electron microscopy (SEM) results of dosages of undoped a), 5% b) and 10% c)  $\text{Yb}^{3+}$  doped  $\text{Cs}_4\text{MnBi}_2\text{Cl}_{12}$  powder. The grain size of them is all in the order of micrometers.

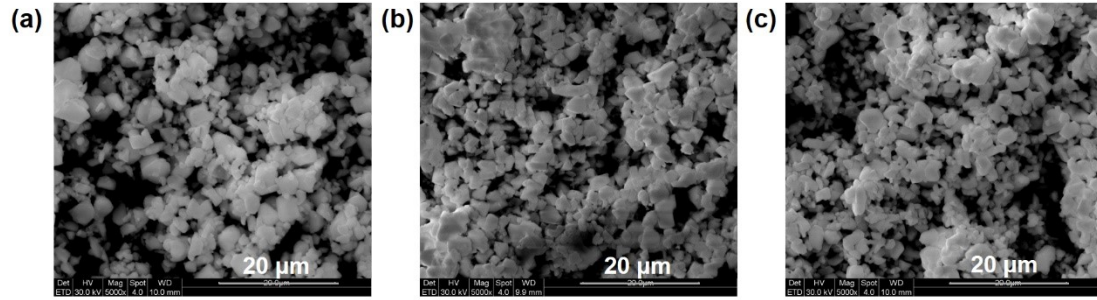

**Figure S2.** The XRD related Rietveld refinement results patterns of 10% Yb<sup>3+</sup> doped Cs<sub>4</sub>MnBi<sub>2</sub>Cl<sub>12</sub> powder. Crosses represent the measured results, black lines are refinement results, blue lines are the difference profile between measured and refinement results, green vertical lines represent the standard diffractions.

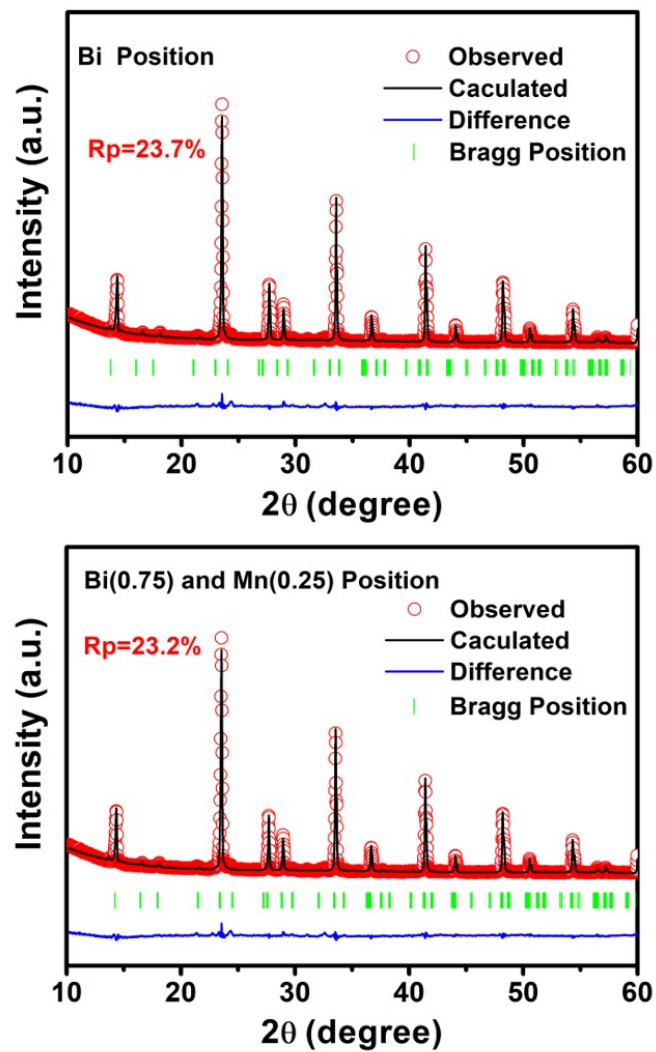

**Figure S3.** The XPS (X-ray photoelectron spectroscopy) survey spectrum of dosages of 10% Yb doped and undoped  $\text{Cs}_4\text{MnBi}_2\text{Cl}_{12}$  powder.

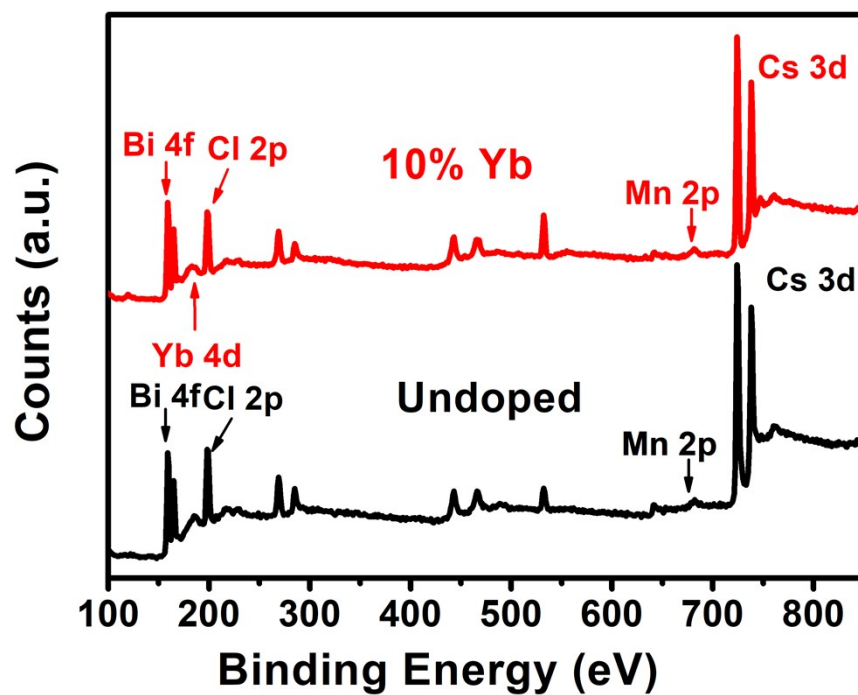

**Figure S4.** The XPS (X-ray photoelectron spectroscopy) survey spectrum of dosages of 10% Yb doped and undoped  $\text{Cs}_4\text{MnBi}_2\text{Cl}_{12}$  powder. The high-resolution XPS spectrum of a) Cs 3d, b) Mn 2p, c) Bi 4f, d) C 1s, e) Cl 2p and f) Yb 4d.

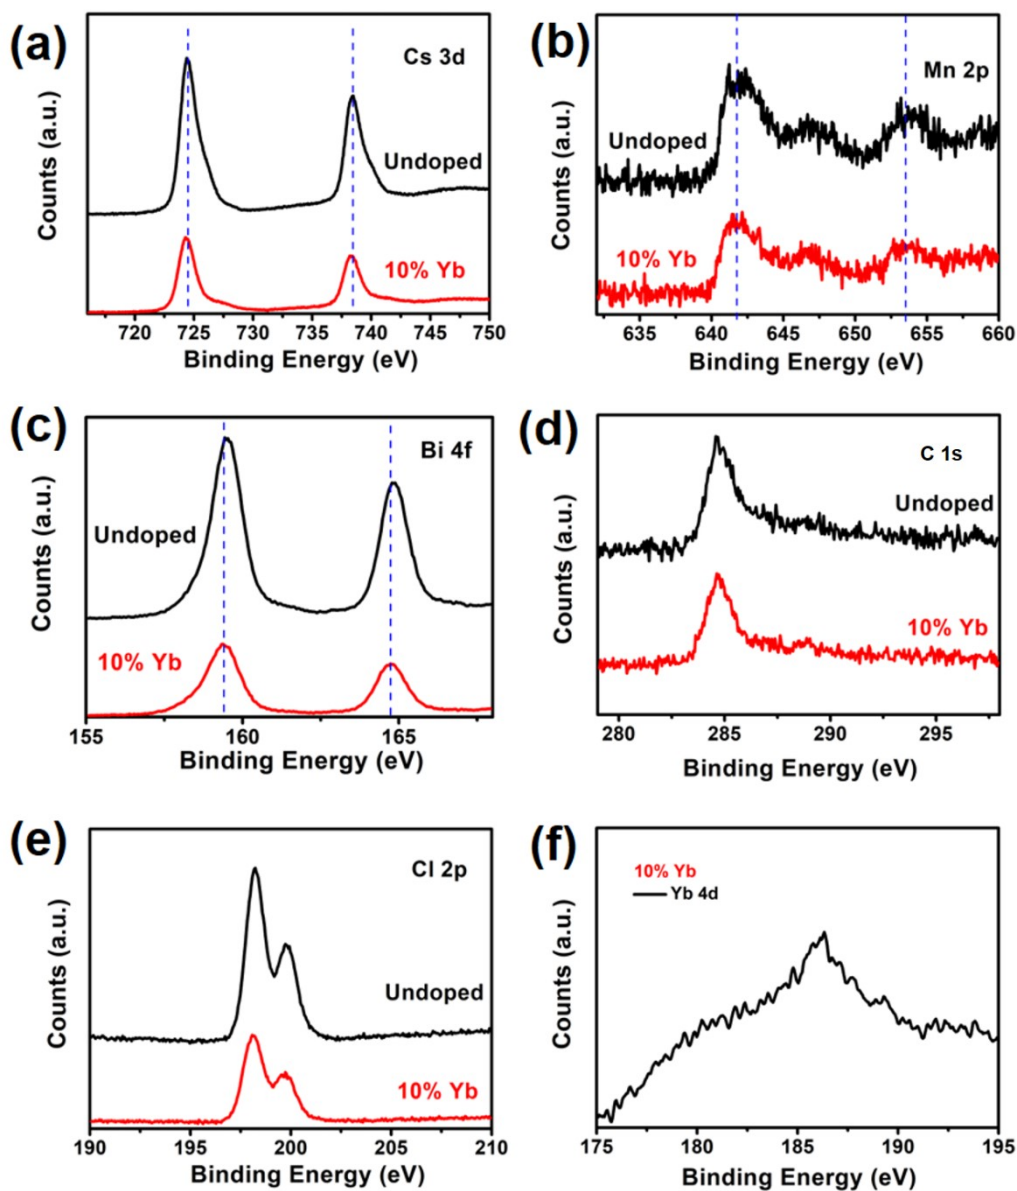

**Figure S5.** Energy Dispersive X-Ray Spectroscopy (EDS) of 5% Yb doped  $\text{Cs}_4\text{MnBi}_2\text{Cl}_{12}$  powder.

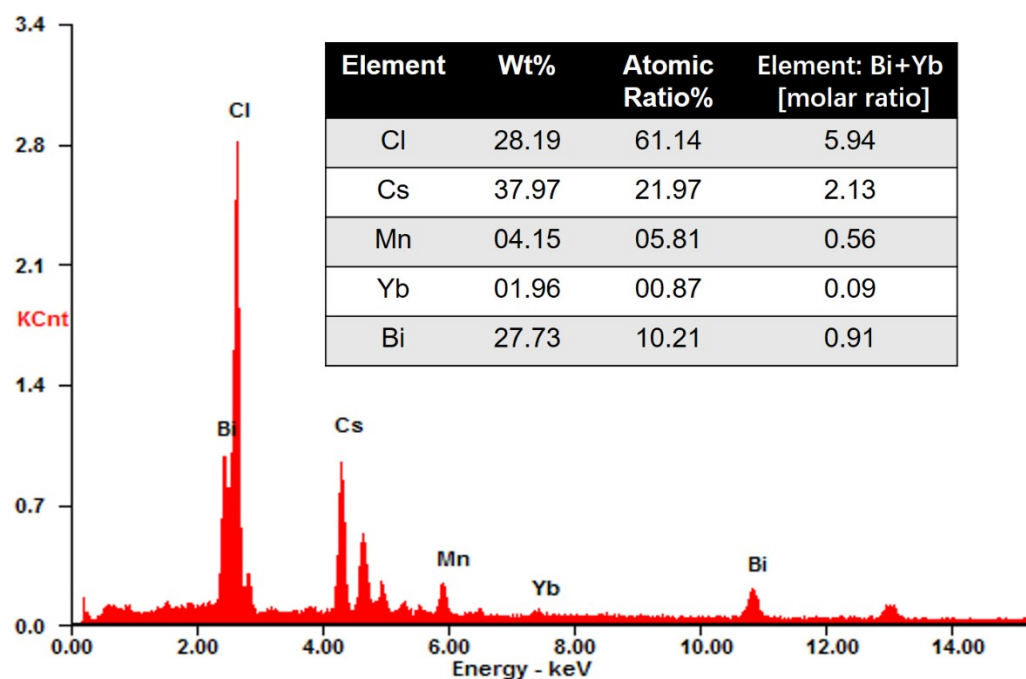

**Figure S6.** Energy Dispersive X-Ray Spectroscopy (EDS) of 10% Yb doped  $\text{Cs}_4\text{MnBi}_2\text{Cl}_{12}$  powder.

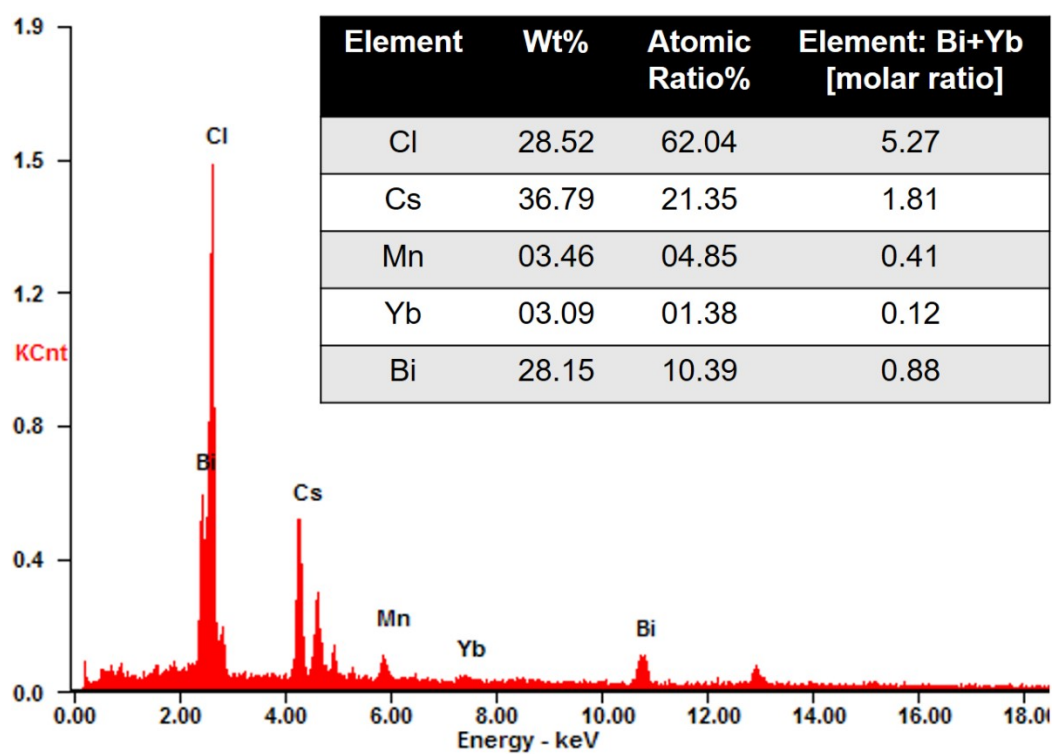

**Figure S7.** PL decay dynamics at 300 K for emission at 580 nm arising from dosages of 5% a) and 20% b)  $\text{Yb}^{3+}$  doped  $\text{Cs}_4\text{MnBi}_2\text{Cl}_{12}$ . Excitation was at 430 nm.

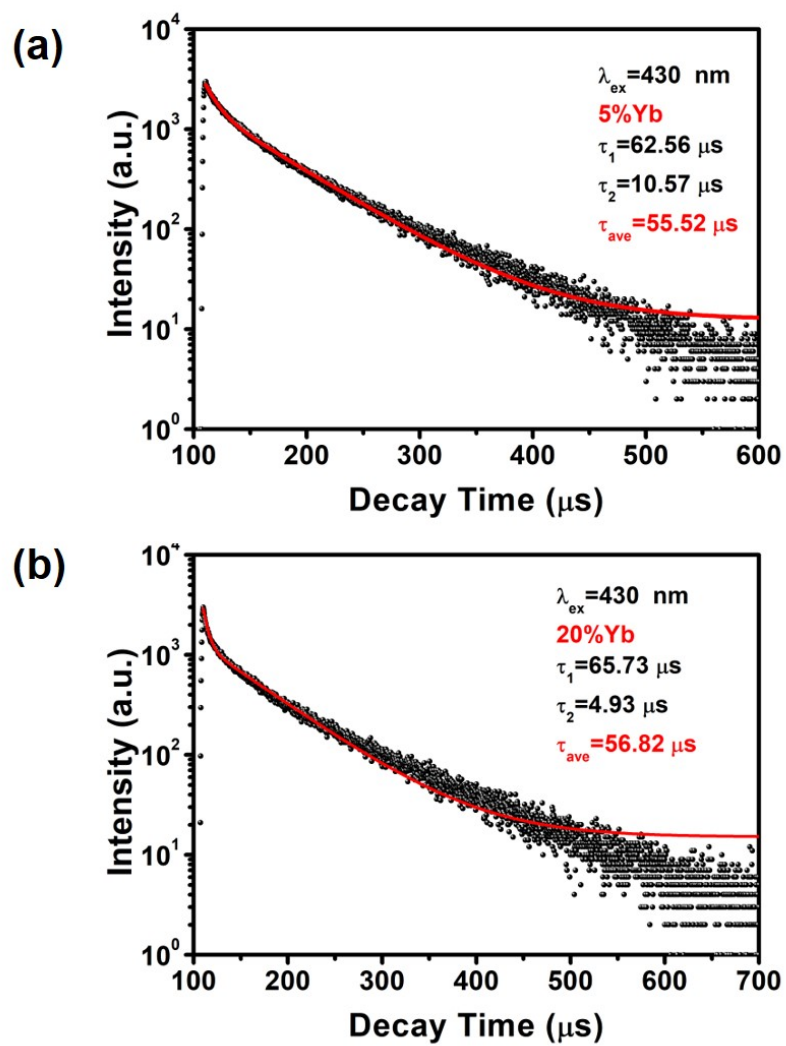

**Figure S8.** PL decay dynamics at 300 K for emission at 580 nm arising from dosages of 5% a) and 20% b)  $\text{Yb}^{3+}$  doped  $\text{Cs}_4\text{MnBi}_2\text{Cl}_{12}$ . Excitation was at 520 nm.

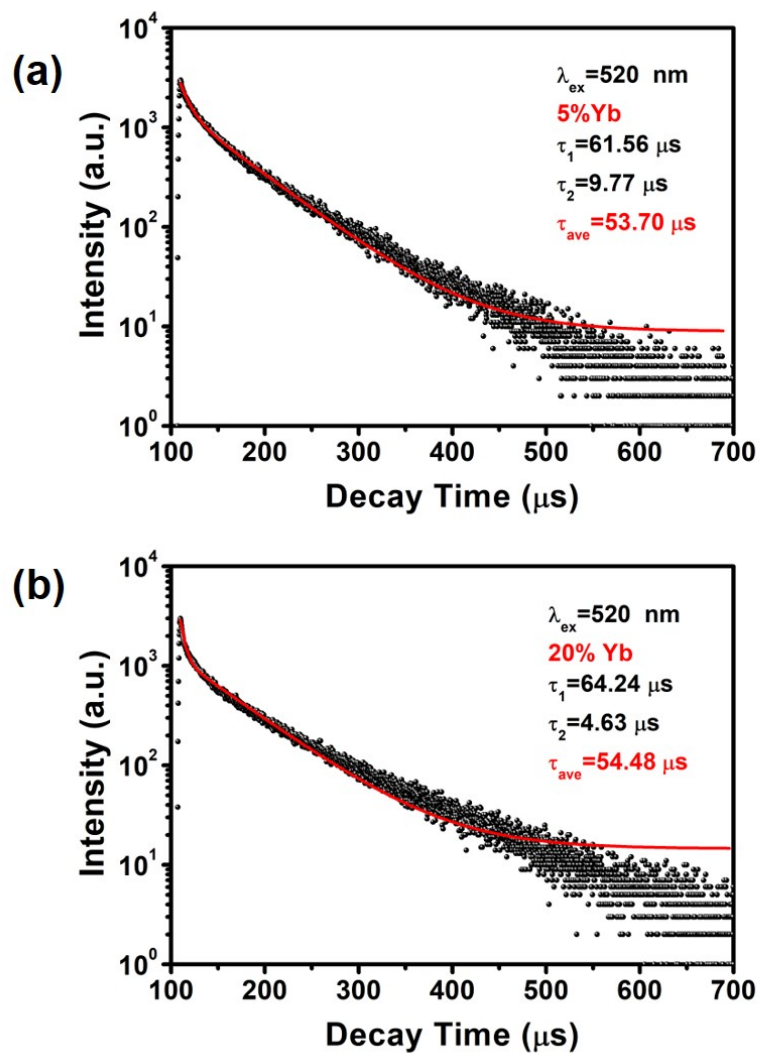

**Figure S9.** The PL spectra of the prepared Yb<sup>3+</sup> doped and undoped Cs<sub>4</sub>MnBi<sub>2</sub>Cl<sub>12</sub> powder samples under 430 nm excitation.

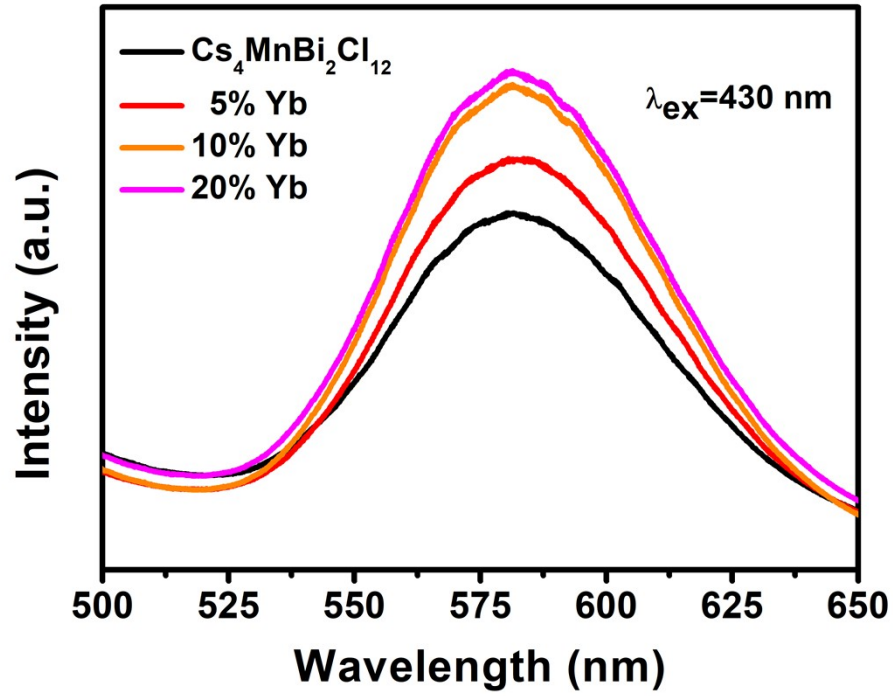

**Figure S10.** The PL spectra of the prepared 10% Yb<sup>3+</sup> doped Cs<sub>4</sub>MnBi<sub>2</sub>Cl<sub>12</sub> and Cs<sub>4</sub>CdBi<sub>2</sub>Cl<sub>12</sub> powder samples under 360 nm excitation.

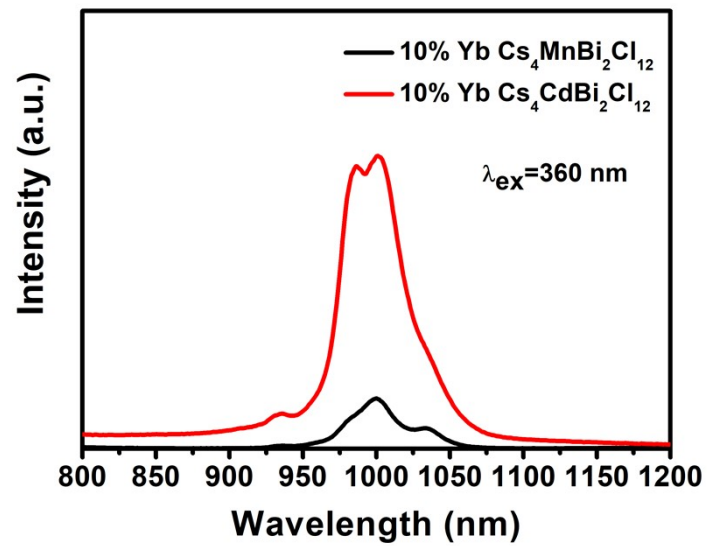

---

**Figure S11.** The PL spectra of the prepared 10% Yb<sup>3+</sup> doped Cs<sub>4</sub>MnBi<sub>2</sub>Cl<sub>12</sub> powder sample. Excited by the 980 nm laser at 80K.

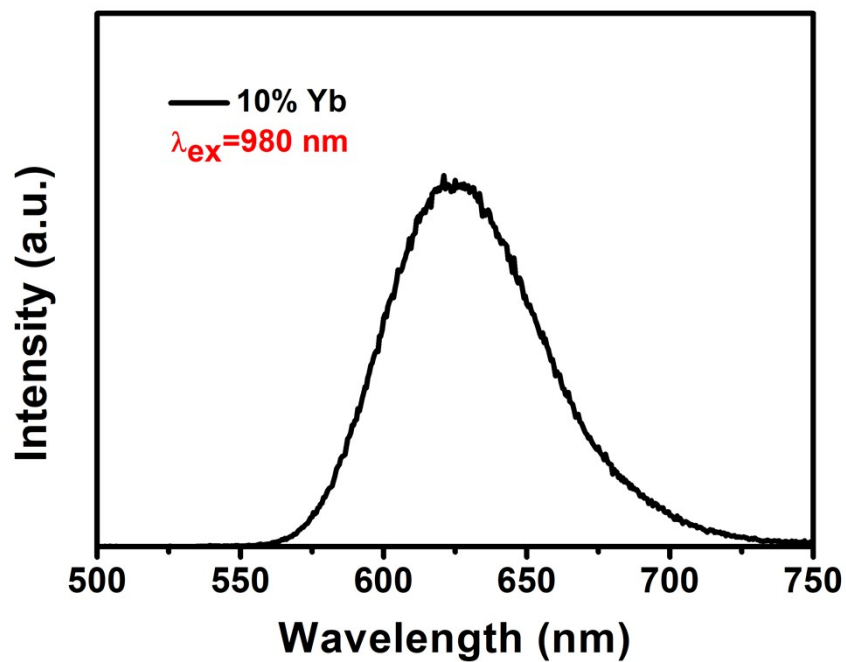

**Figure S12.** The PL spectra of the prepared 10% Yb<sup>3+</sup> doped Cs<sub>4</sub>MnBi<sub>2</sub>Cl<sub>12</sub> powder sample. The results are excited by the 980 nm diode laser with the power from 180 mW to 1190 mW.

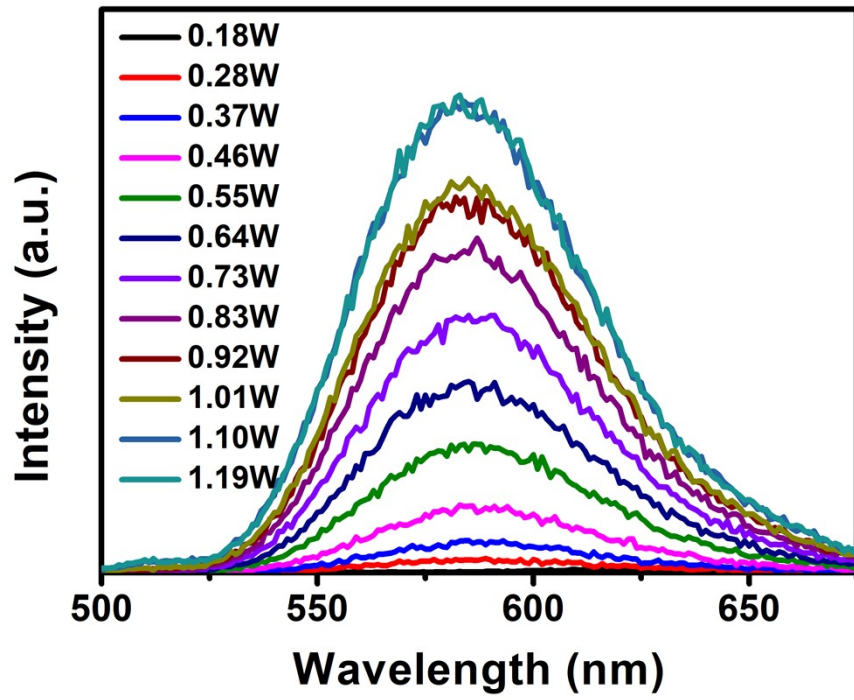

**Figure S13.** XRD patterns of  $\text{Er}^{3+}$  and  $\text{Nd}^{3+}$  ions doped  $\text{Cs}_4\text{MnBi}_2\text{Cl}_{12}$ .

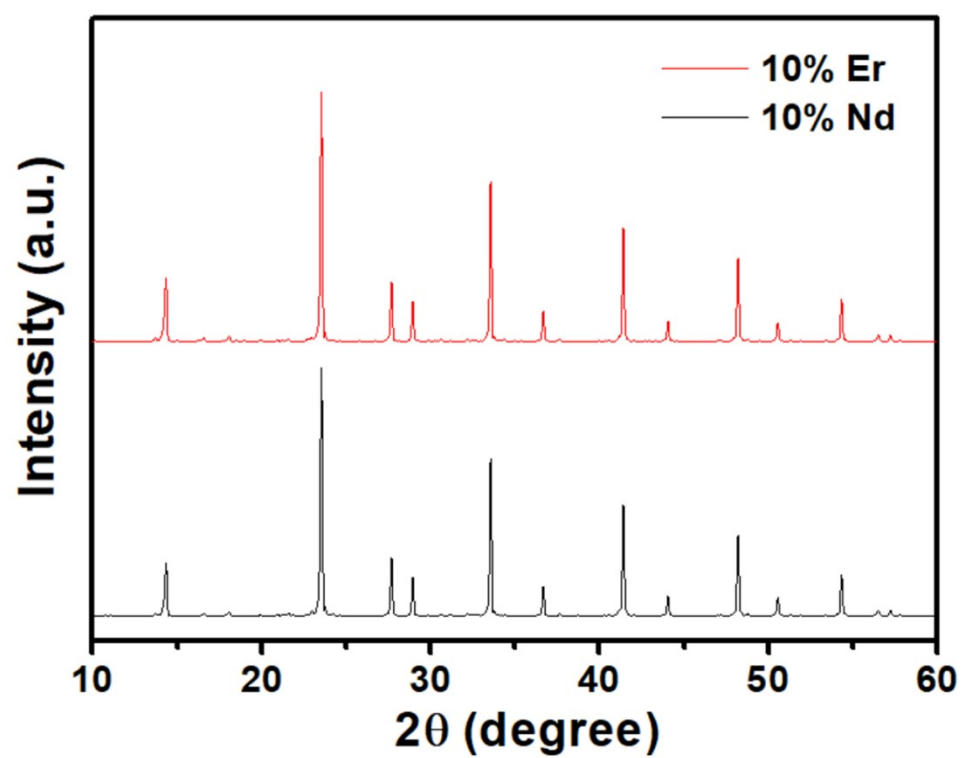

**Figure S14.** The PL spectra of the prepared 10%  $\text{Cs}_4\text{MnBi}_2\text{Cl}_{12}$  samples doped with  $\text{Er}^{3+}$  and  $\text{Nd}^{3+}$  ions. Excited by the 360 nm laser at 300K.

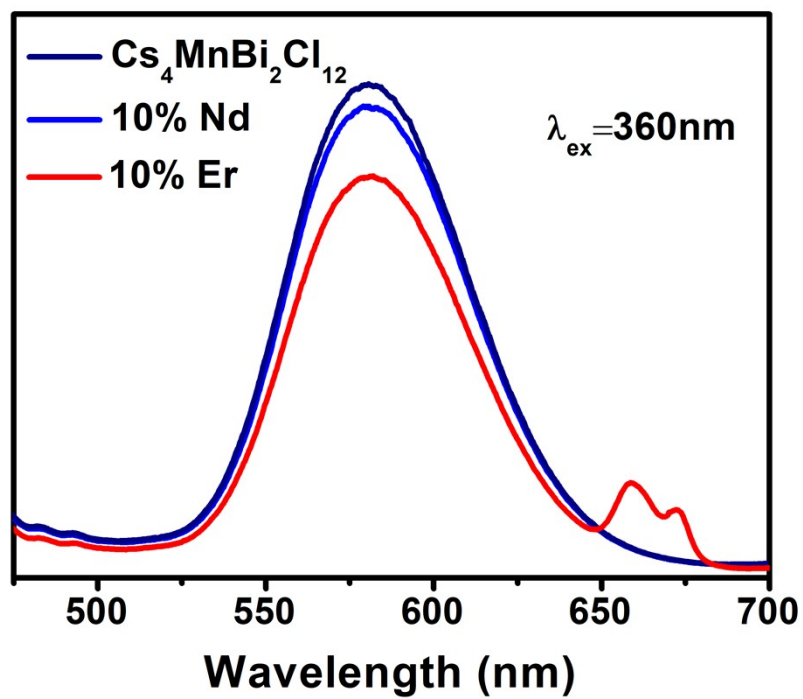

**Figure S15.** Absorption spectra of doped  $\text{Cs}_4\text{MnBi}_2\text{Cl}_{12}$  with 5%, 10% and 20%  $\text{Yb}^{3+}$  dosages and undoped  $\text{Cs}_4\text{MnBi}_2\text{Cl}_{12}$  powders.

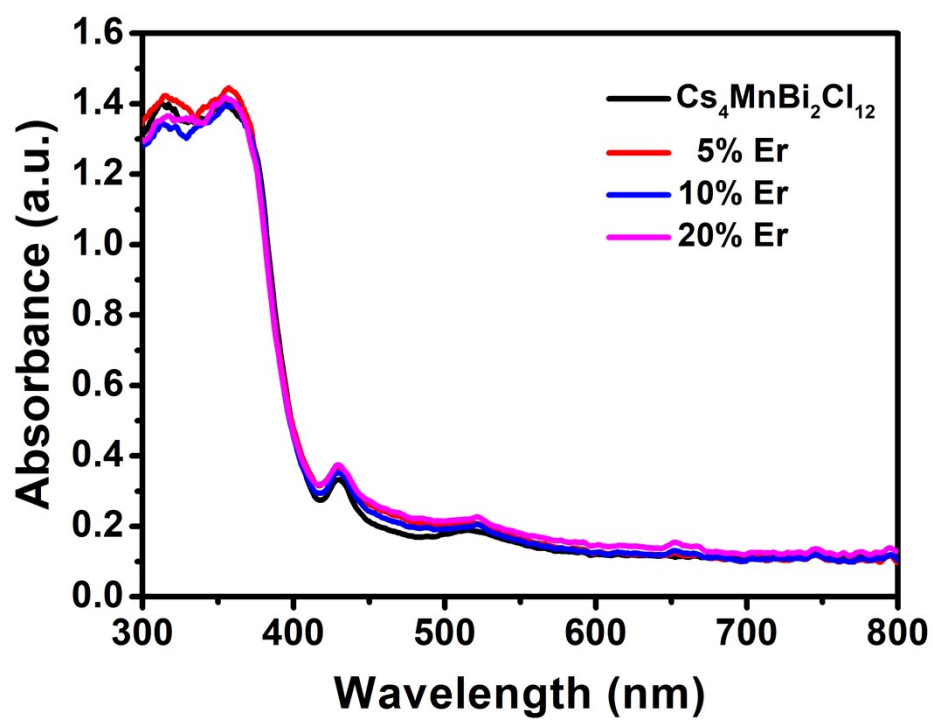

---

**Figure S16.** Near infrared PL spectra of  $\text{Er}^{3+}$  powder sample excited by different wavelength laser. The results are excited by the 360 nm, 430 nm and 520 nm diode laser at 300K.

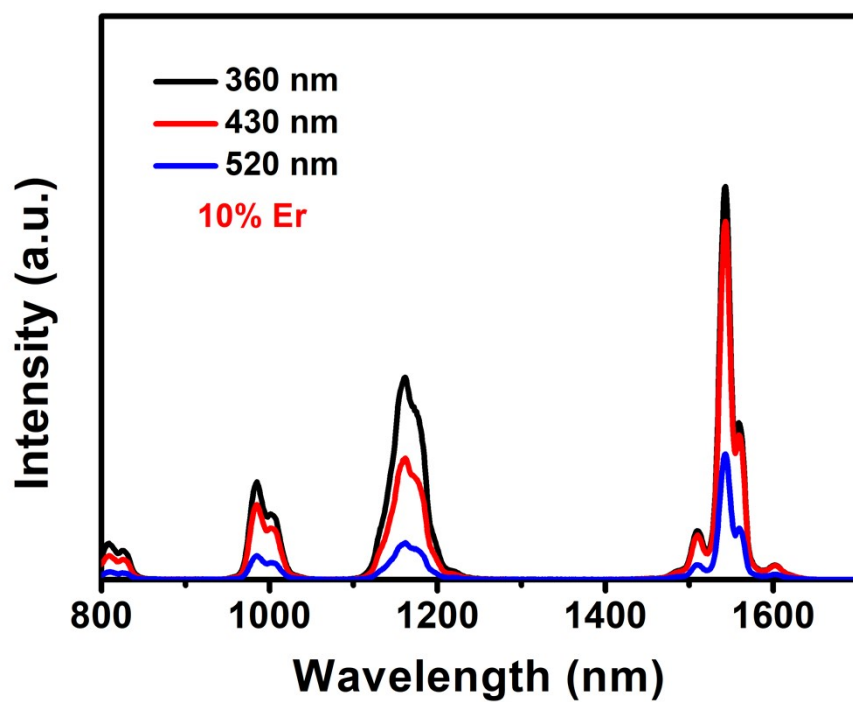

**Figure S17.** The PL spectra of the prepared  $\text{Cs}_4\text{MnBi}_2\text{Cl}_{12}$  samples co-doped with  $\text{Yb}^{3+}$ - $\text{Er}^{3+}$  ions. Excited by the 360 nm laser at 300K.

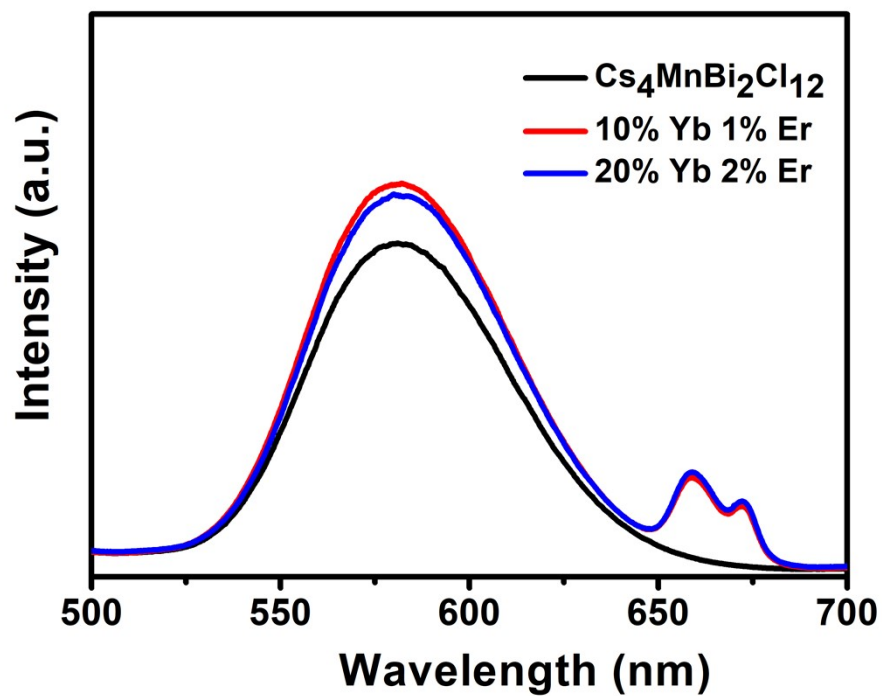

Supplement: d2tc01024k1.pdf [file d2tc01024k1.pdf]
